# Supplementary material for: Inhibitory effect of PPARγ on NLRP3 inflammasome activation
Source: PubMed Central journal article supplement (PMC7797672; doi:10.7150/thno.46873), 2021-01-01
Supplement: thnov11p2424s1.pdf [file thnov11p2424s1.pdf]

1

Supplementary Figures

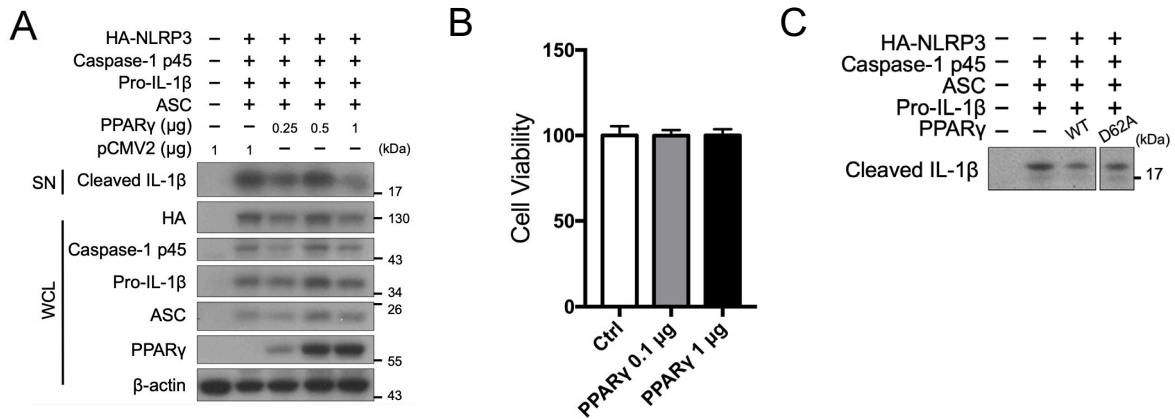

2

3 **Figure S1. PPARγ expression attenuated the production of cleaved IL-1β in NLRP3 in-**  
 4 **flammasome reconstituted HEK293T cells.**

5 (A) Immunoblot analysis of mature IL-1β in the supernatant (SN) and indicated components  
 6 and PPARγ in whole cell lysates (WCL) of NLRP3 inflammasome-reconstituted HEK293T  
 7 cells transfected with indicated components. IL-1β production was significantly decreased in  
 8 1 μg PPARγ transfection group. (B) MTT assay of HEK293T cells transfected with control  
 9 (Ctrl, pCMV2), 0.1 μg or 1 μg PPARγ expression plasmids (n = 3 in each group). Transfection  
 10 of 0.1 and 1 μg PPARγ did not change the cell viability. (C) Immunoblot analysis of mature  
 11 IL-1β in the supernatant of NLRP3 inflammasome-reconstituted HEK293T cells expressing  
 12 wild-type and D62A mutant PPARγ.

13

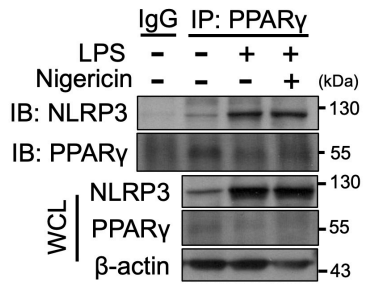

1

2 **Figure S2. PPAR $\gamma$  interacted with NLRP3 in mouse peritoneal macrophages.**

3 Immunoprecipitation and immunoblot analysis of the interaction between NLRP3 and PPAR $\gamma$   
 4 in mouse peritoneal macrophages. Reverse co-immunoprecipitation was performed by precip-  
 5 itating PPAR $\gamma$  and detecting NLRP3.

6

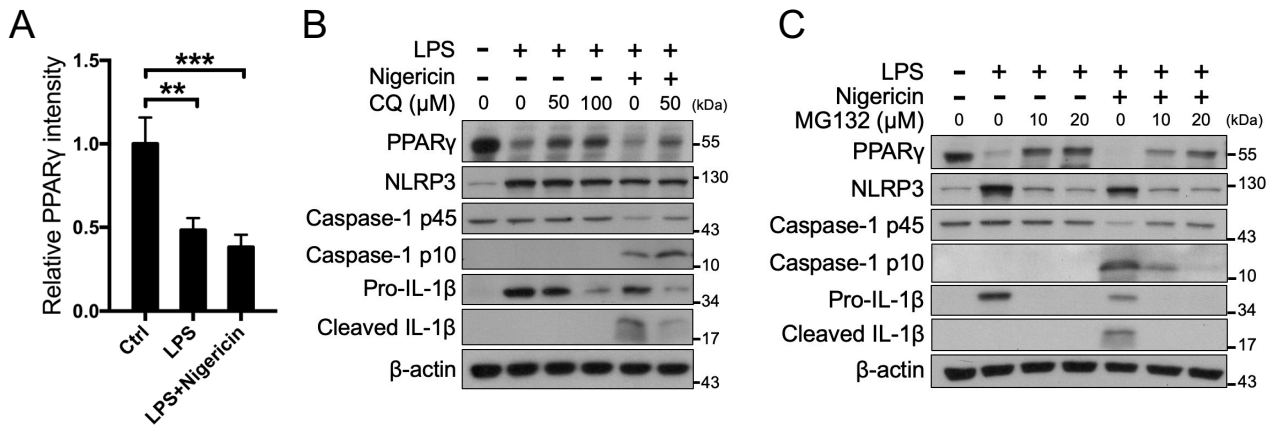

1  
2  
3  
4  
5  
6  
7  
8  
9

**Figure S3. MG132, but not CQ, attenuated NLRP3 inflammasome activation in mouse peritoneal macrophages.**

(A) Quantification of PPAR $\gamma$  (green) intensity per cell in mouse peritoneal macrophages from Figure 3G (n = 6 in each group). (B and C) Immunoblot analysis of caspase-1 activation and IL-1 $\beta$  maturation in mouse peritoneal macrophages treated with (B) chloroquine (CQ) and (C) MG132 with indicated concentration.  $**P < 0.01$  and  $***P < 0.001$  by one-way ANOVA with Fisher's LSD test.

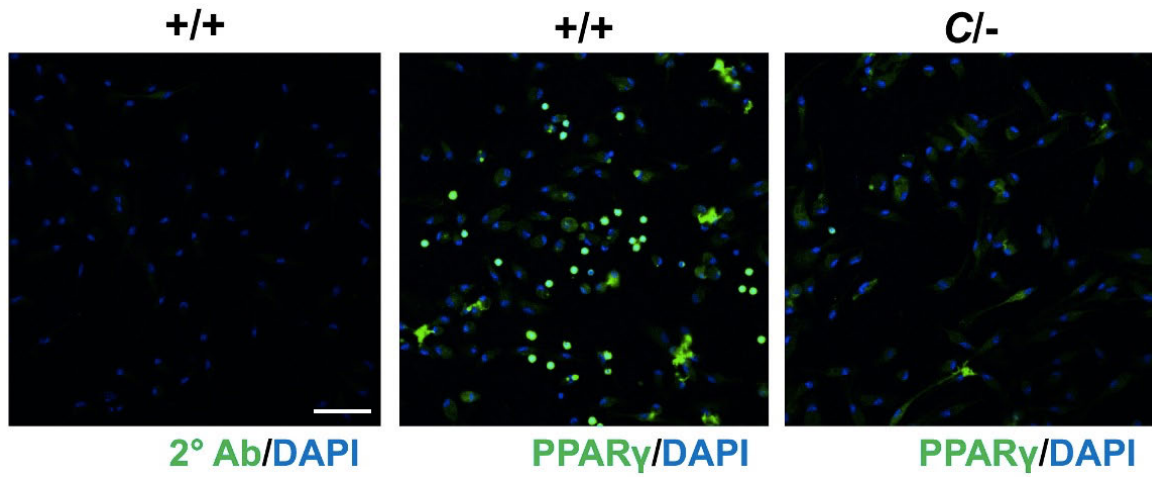

1  
2  
3  
4  
5  
6

**Figure S4. PPAR $\gamma$  expression was decreased in *Pparg*<sup>C/-</sup> mouse peritoneal macrophages.** Immunofluorescent staining of PPAR $\gamma$  (*green*) in *Pparg*<sup>+/+</sup> and *Pparg*<sup>C/-</sup> mouse peritoneal macrophages. The control is no primary antibody followed by incubation with secondary antibodies and detection reagents. Scale bar, 50  $\mu$ m.

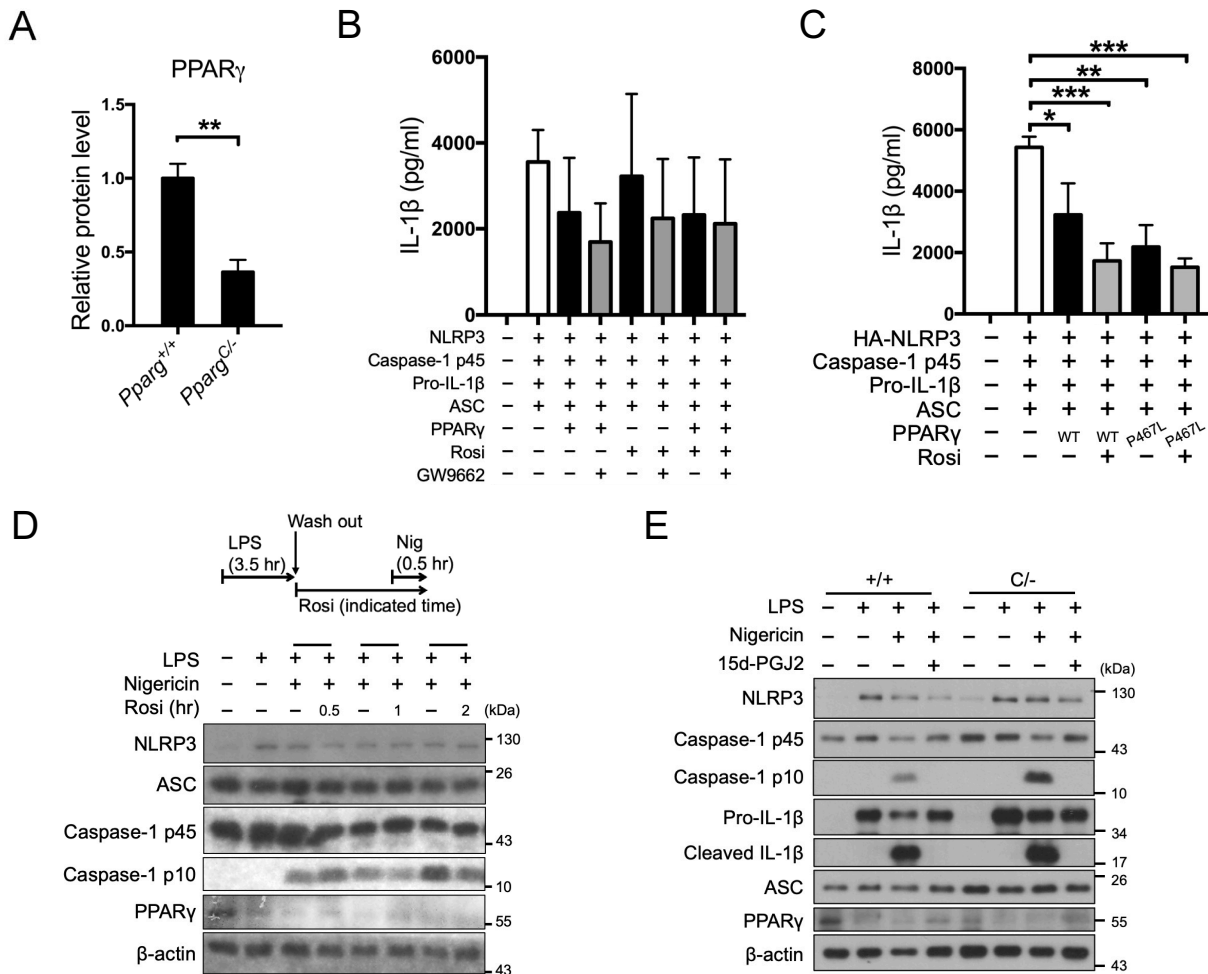

1  
2 **Figure S5. Rosiglitazone attenuated NLRP3 inflammasome through a PPAR $\gamma$ -independ-**  
3 **ent mechanism.**  
4 (A) Quantification of PPAR $\gamma$  protein level in untreated, control wild-type (*Pparg*<sup>+/+</sup>) and  
5 *Pparg*<sup>-/-</sup> mouse peritoneal macrophages from Figure 6G, 7A, and 7B. (B and C) IL-1 $\beta$  levels  
6 in the culture medium were detected by ELISA related to Figure 6H and 6I. Culture medium  
7 was collected from NLRP3 inflammasome-reconstituted HEK293T cells transfected with in-  
8 dicated components and PPAR $\gamma$  (WT and P467L mutant). Rosiglitazone (Rosi, 20  $\mu$ M) and  
9 GW9662 (20  $\mu$ M) were treated for 24 h after transfection. Three independent experiments were  
10 included. (D) Immunoblot analysis of caspase-1 activation and IL-1 $\beta$  maturation in mouse per-  
11 itoneal macrophages treated with rosiglitazone (Rosi, 20 $\mu$ M) for indicated time by Signal-2  
12 exposure protocol. A schematic diagram on the top shows the experimental design of co-treat-  
13 ment with Rosi by Signal-2 exposure protocol. (E) Immunoblot analysis of caspase-1 activation  
14 and IL-1 $\beta$  maturation in *Pparg*<sup>+/+</sup> and *Pparg*<sup>-/-</sup> mouse peritoneal macrophages treated with  
15 15d-PGJ2 (2.5  $\mu$ M) by Signal-2 exposure protocol. \*\* $P$  < 0.01 by *t*-test in (A). \* $P$  < 0.05, \*\* $P$   
16 < 0.01 and \*\*\* $P$  < 0.001 by one-way ANOVA with Fisher's LSD test in (C).

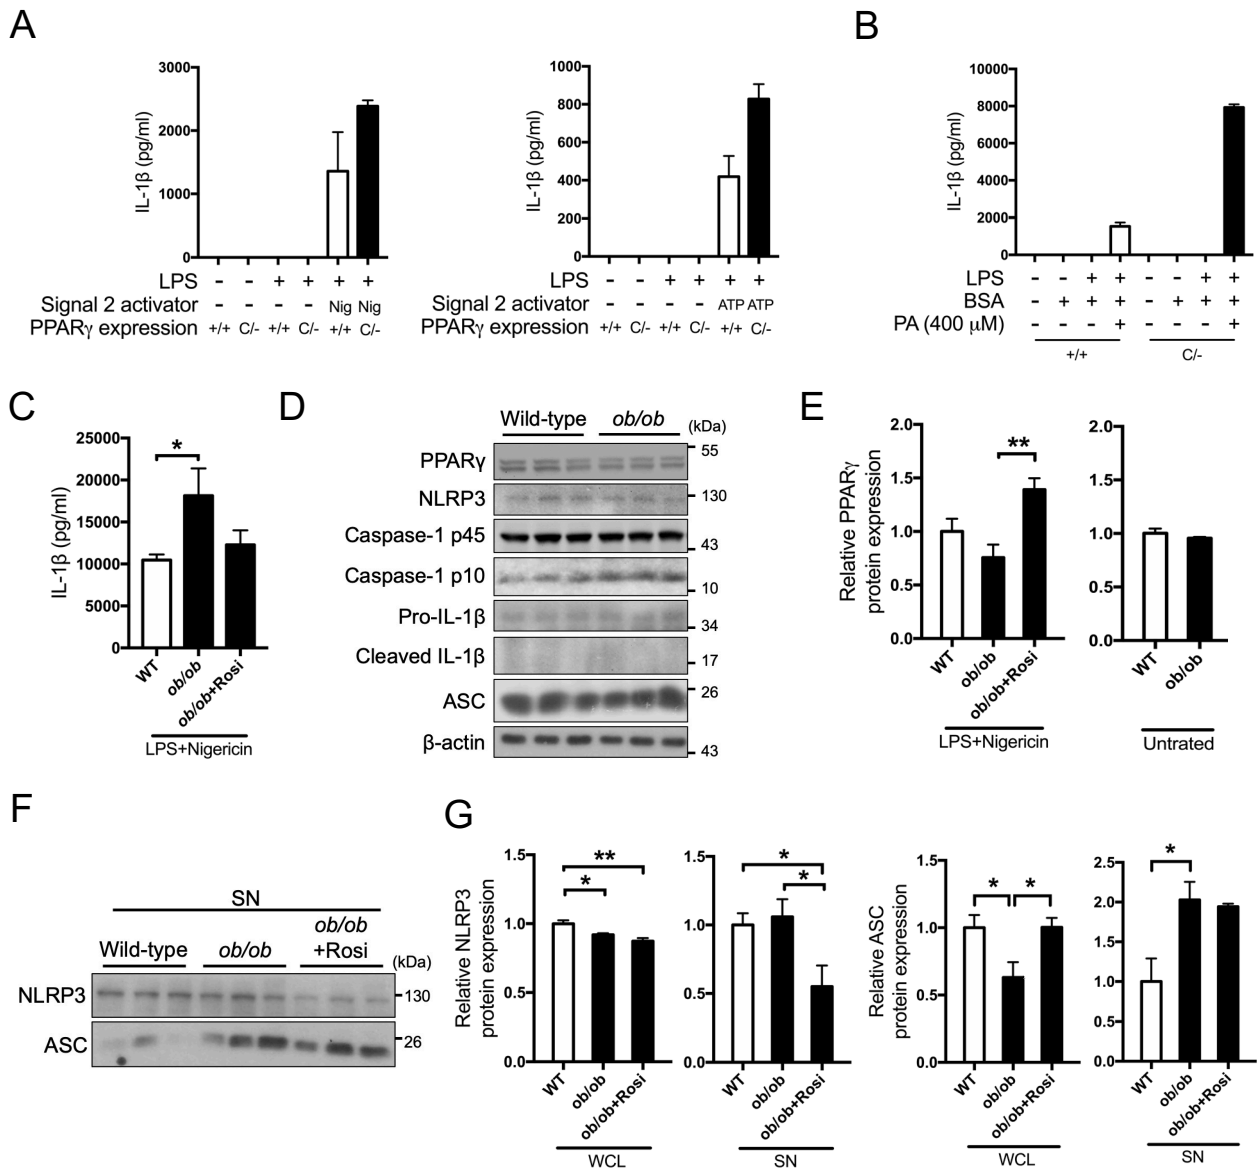

1

2 **Figure S6. PPAR $\gamma$  is required to limit NLRP3 inflammasome activation in mice.**

3 (A and B) IL-1 $\beta$  levels in the culture medium were detected by ELISA from Figure 7A and 7B.

4 Culture medium was collected from LPS-primed wild-type (*Pparg*<sup>+/+</sup>) and *Pparg*<sup>C/-</sup> mouse peritoneal macrophages treated with (A) nigericin (Nig) and ATP, or with (B) palmitic acid (PA).

5 Two independent experiments were included. (C) IL-1 $\beta$  levels in the culture medium were

6 detected by ELISA from Figure 7C. Culture medium was collected from lean control and *ob/ob*

7 obese mouse peritoneal macrophages treated *ex vivo* with LPS and nigericin, as well as rosiglitazone, by Signal-2 exposure protocol. Three independent experiments were included. (D)

8 Immunoblot analysis of caspase-1 activation and mature IL-1 $\beta$  in the supernatant and NLRP3

9 inflammasome components and PPAR $\gamma$  in the cell lysates of untreated, basal lean control and

10 *ob/ob* obese mouse peritoneal macrophages. The supernatant was collected after 10 h culture

11

12

1 in FBS-free RPMI medium. Three independent experiments were included in this blot. (E)  
2 Quantification of PPAR $\gamma$  protein levels in the cell lysates of LPS+nigericin treated (from Fig-  
3 ure 7C) or untreated (from Figure S6D) lean control and *ob/ob* obese mouse peritoneal macro-  
4 phages with Signal-2 exposure protocol. (F) Immunoblot analysis of NLRP3 and ASC in the  
5 supernatant of lean control and *ob/ob* obese mouse peritoneal macrophages treated *ex vivo* with  
6 LPS and nigericin, as well as rosiglitazone, by Signal-2 exposure protocol from Figure 7C. (G)  
7 Quantification of NLRP3 (left panels) and ASC (right panels) protein levels in the whole cell  
8 lysate (WCL) and supernatant (SN) of lean control and *ob/ob* obese mouse peritoneal macro-  
9 phages treated *ex vivo* with LPS and nigericin, as well as rosiglitazone, by Signal-2 exposure  
10 protocol from Figure 7C and S6F. \* $P < 0.05$  and \*\* $P < 0.01$  by one-way ANOVA with Fisher's  
11 LSD test.  
12  
13  
14

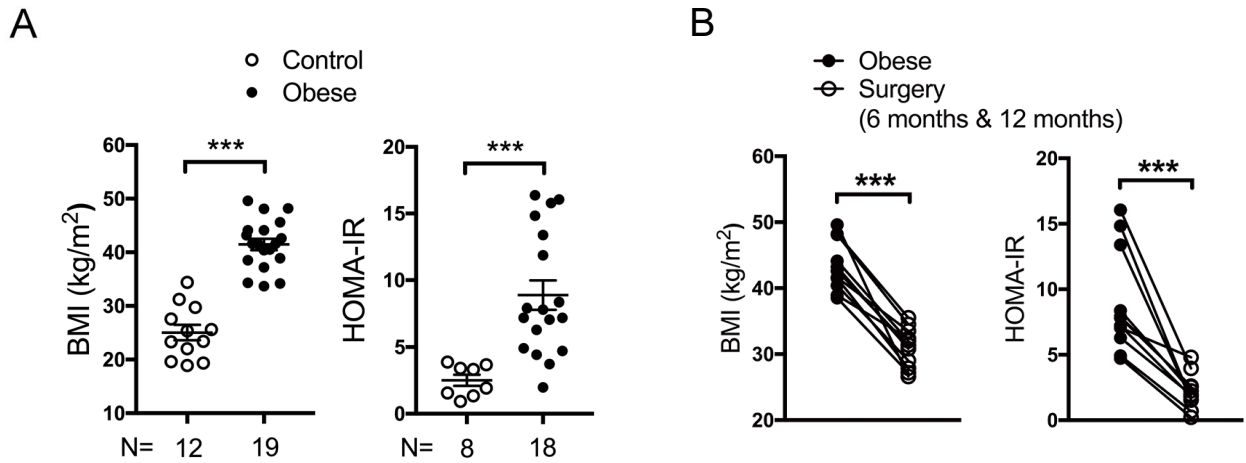

1

2 **Figure S7. BMI and HOMA-IR were changed between obese patients and control sub-**  
 3 **jects.**

4 (A) BMI and HOMA-IR of control and obese subjects before weight-loss surgery. (B) BMI  
 5 and HOMA-IR of obese subjects before (Obese) and 6 or 12 months after (Surgery) weight-  
 6 loss surgery. \*\*\* $P < 0.001$  by t-test in (A), and \*\*\* $P < 0.001$  by paired t-test in (B).

7

8

9



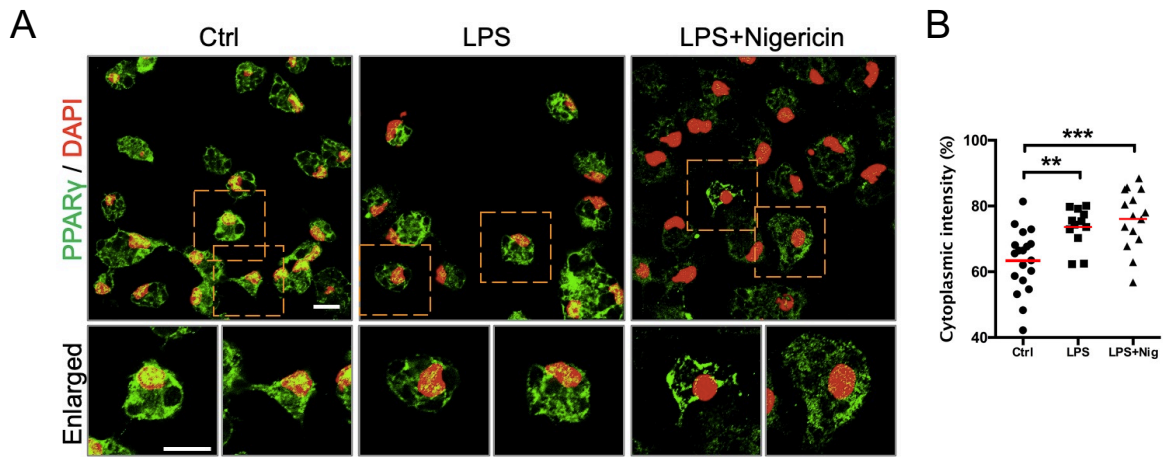

1

2 **Figure S8. Cellular distribution of PPAR $\gamma$  is altered during NLRP3 inflammasome acti-**  
 3 **vation.**

4 (A) Immunofluorescent staining of PPAR $\gamma$  (*green*) and DAPI (*red*) in mouse peritoneal mac-  
 5 rophages of control, LPS, and LPS+nigericin groups. Scale bar, 10  $\mu$ m. (B) Quantification of  
 6 PPAR $\gamma$  intensity in the cytosol by the TissueFAXS fluorescence analysis module. \*\* $P < 0.01$   
 7 and \*\*\* $P < 0.001$  by one-way ANOVA with Fisher's LSD test.

8

9

10

**A**

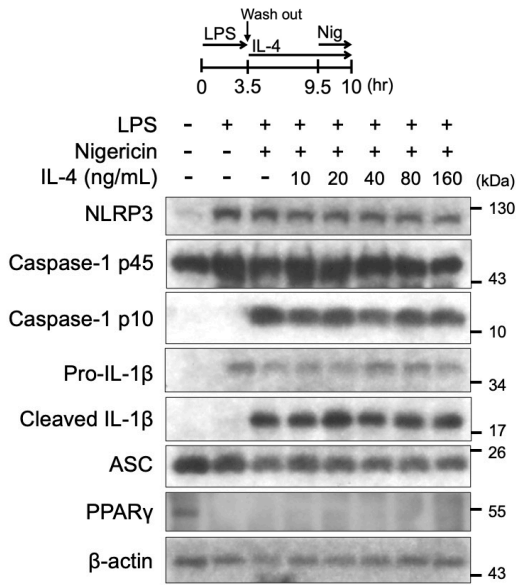

**B**

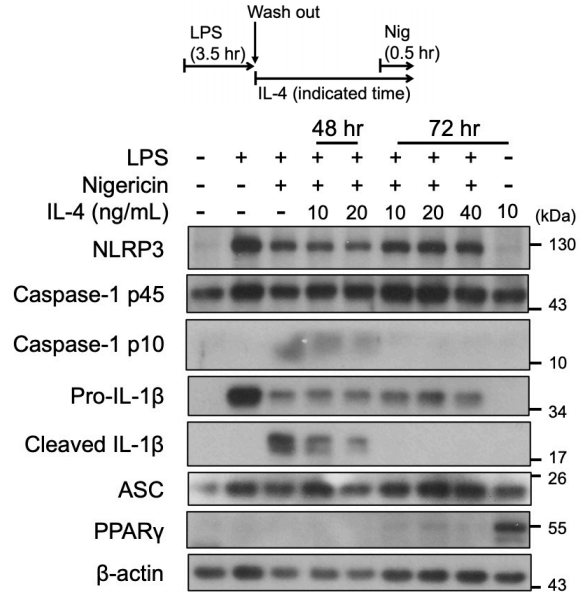

1  
2  
3  
4  
5  
6  
7  
8

**Figure S9. Long-term treatment, but not short-term treatment, of IL-4 suppressed NLRP3 inflammasome activation and modestly increased PPAR $\gamma$  protein level.**

(A and B) Immunoblot analysis of caspase-1 activation and IL-1 $\beta$  maturation in mouse peritoneal macrophages treated with IL-4 for (A) 6.5 h and (B) 48 and 72 h by Signal-2 exposure protocol. Schematic diagrams on the top show the experimental design of co-treatment with IL-4 in the (A) short-term and (B) long-term protocol of NLRP3 inflammasome activation.

1A

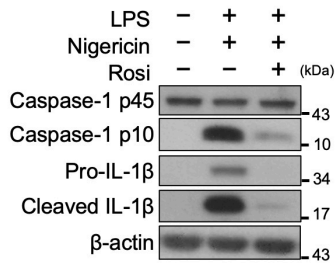

1G

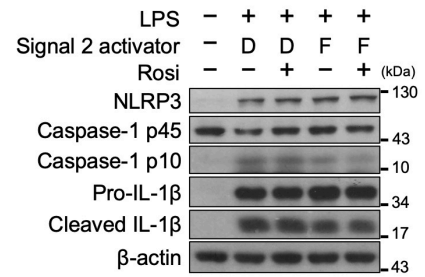

1D

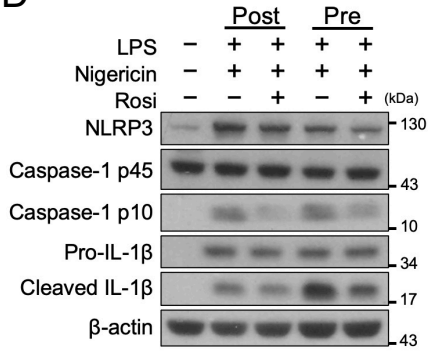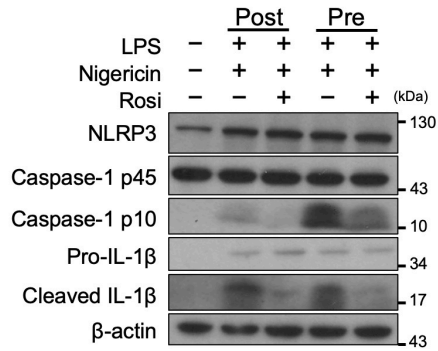

1

2 **Figure S10. Repeated data of the immunoblotting related to Figure 1.**

3

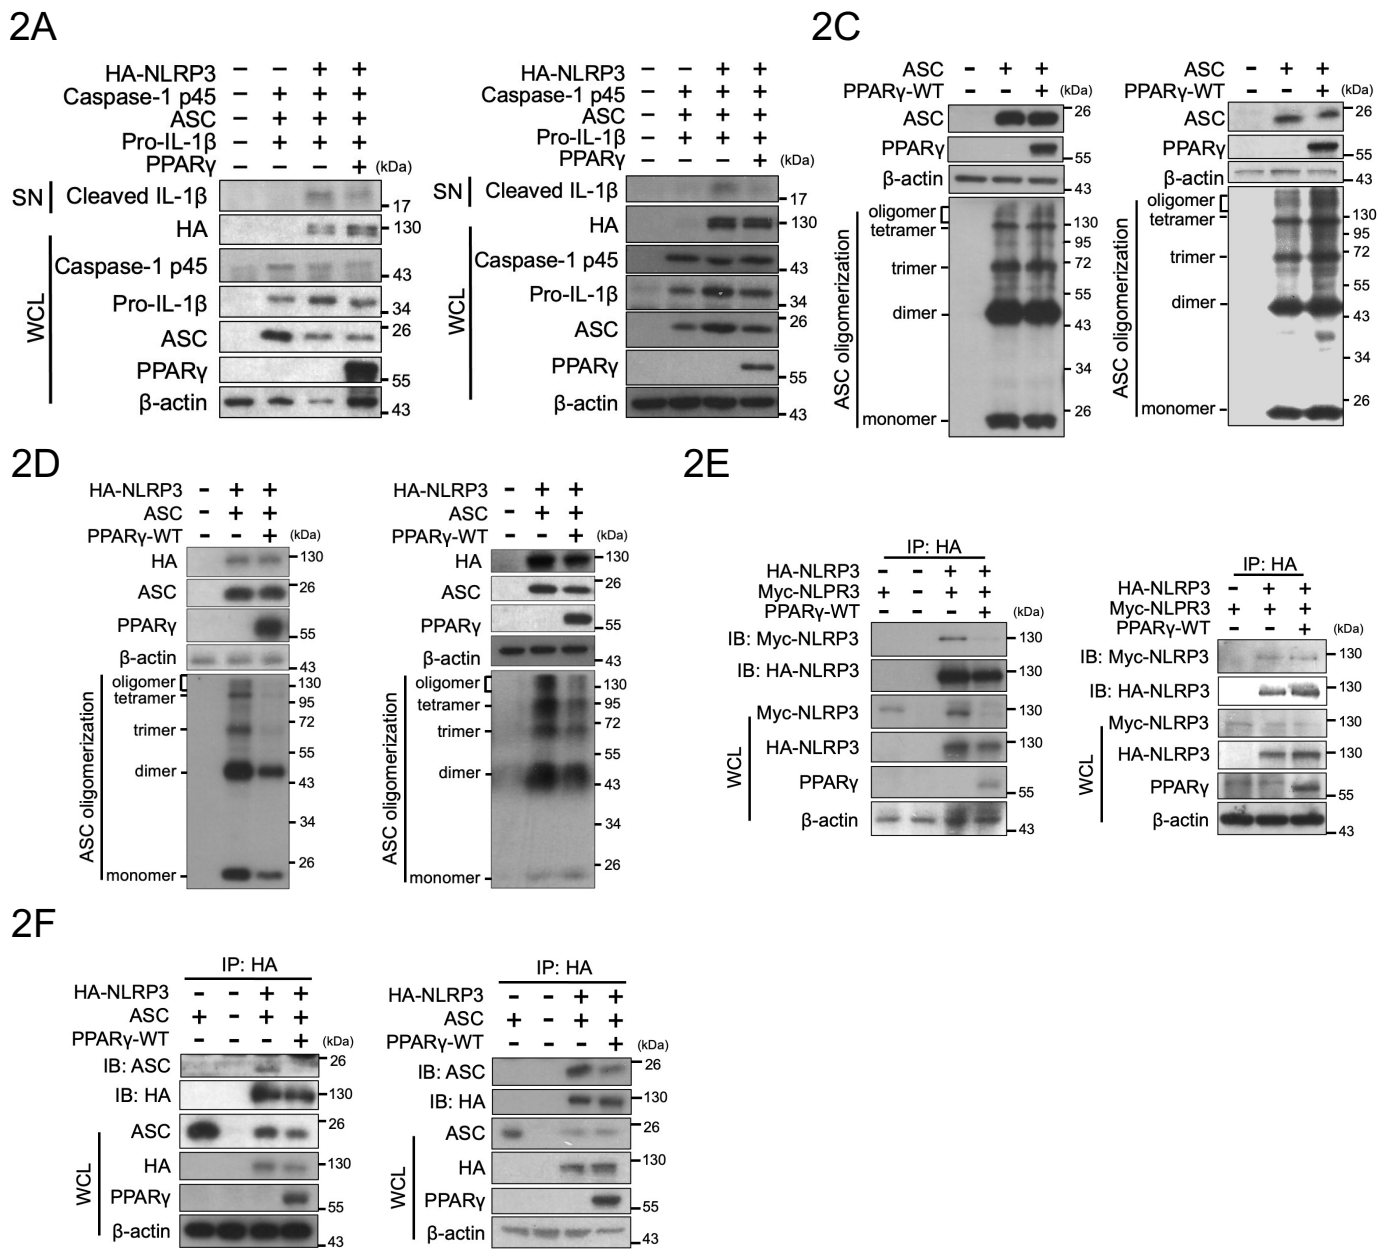

1

2 **Figure S11. Repeated data of the immunoblotting related to Figure 2.**

3

3A

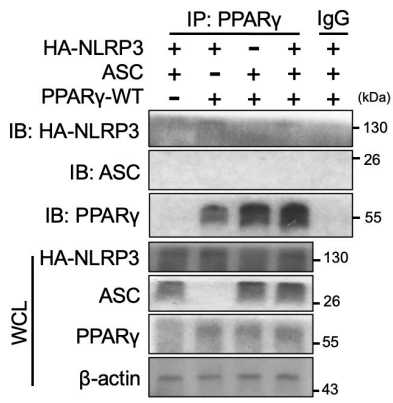

3B

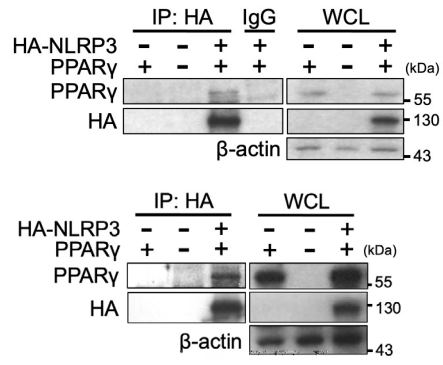

3C

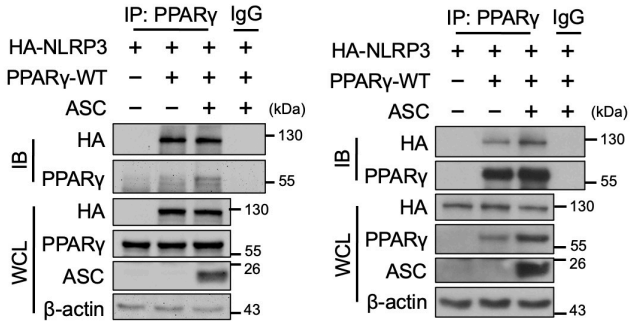

3F

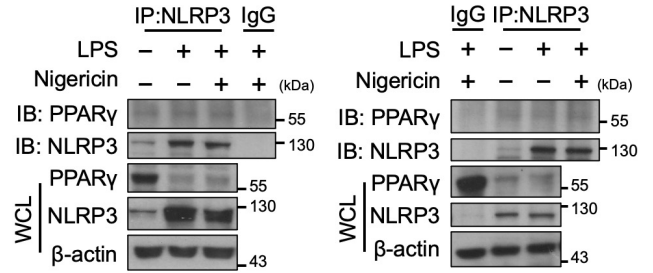

1

2 **Figure S12. Repeated data of the immunoblotting related to Figure 3.**

3

4B

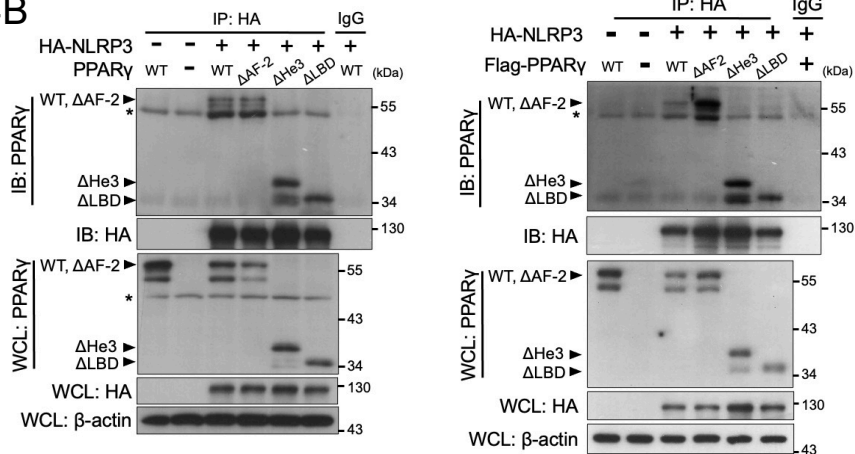

4G

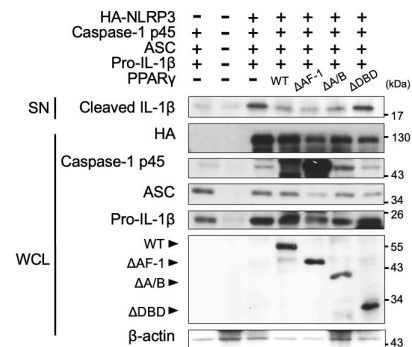

4C

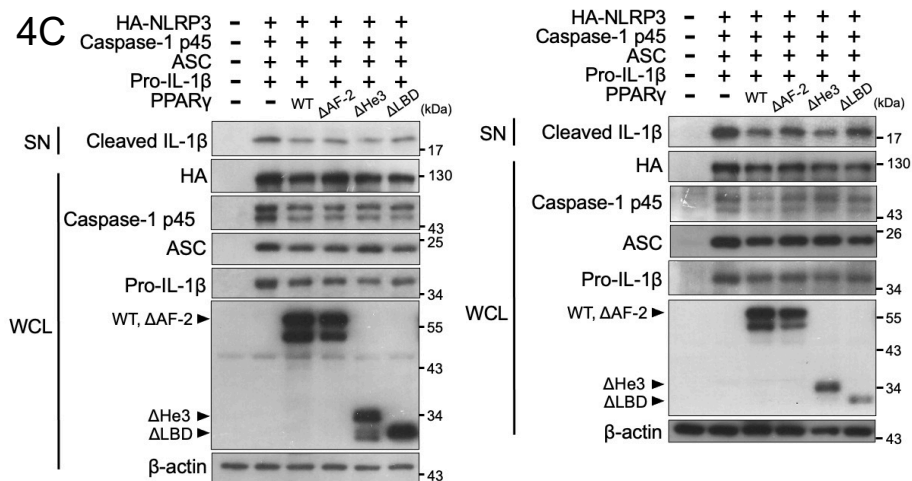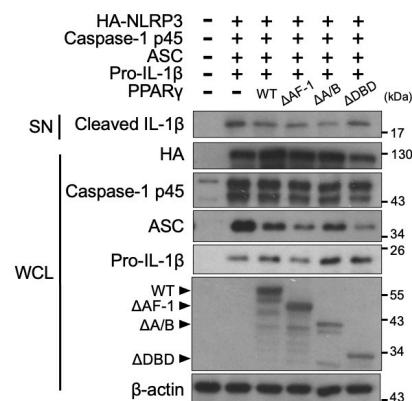

4F

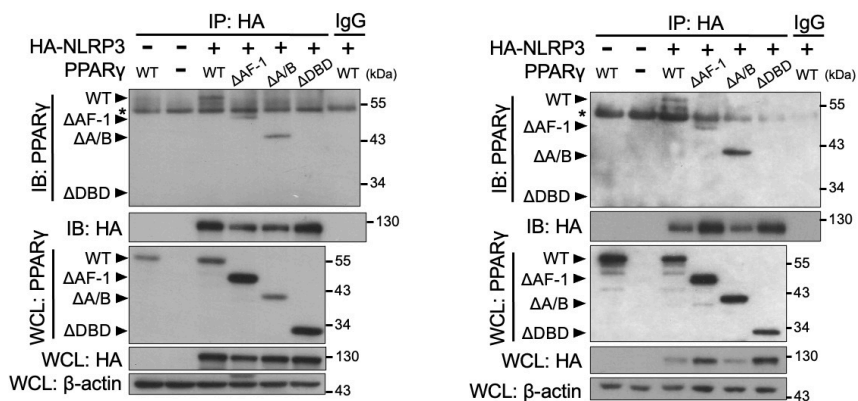

1

2 **Figure S13. Repeated data of the immunoblotting related to Figure 4.**

3

5B

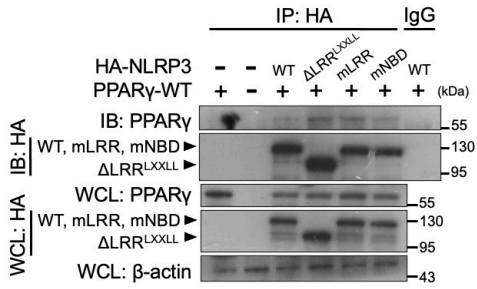

5D

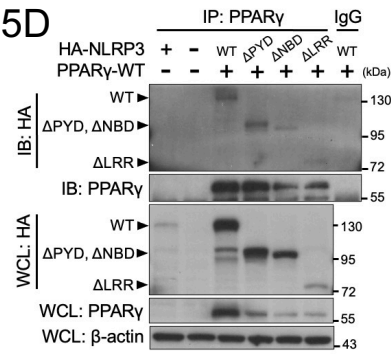

5E

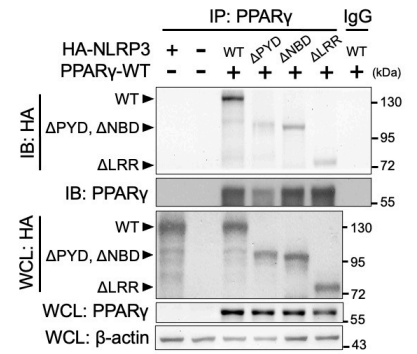

5F

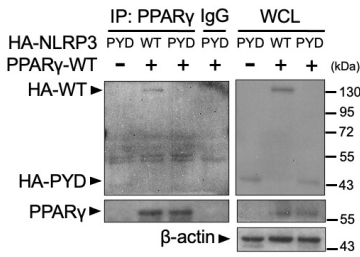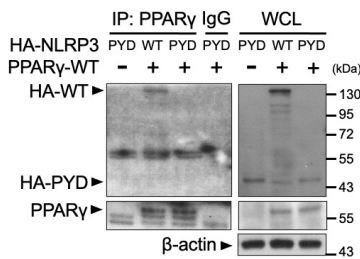

5G

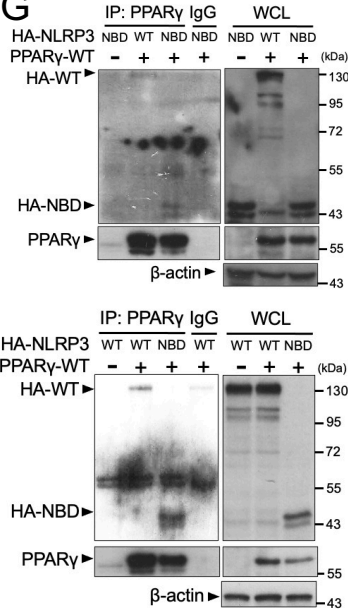

5H

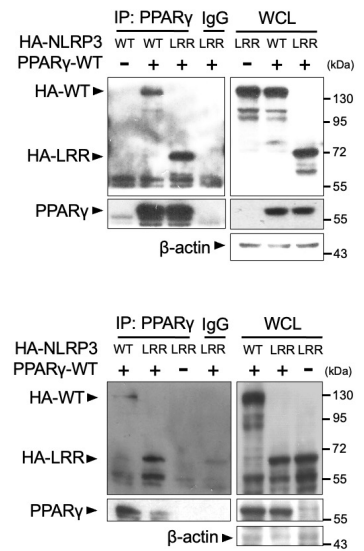

1  
2  
3

Figure S14. Repeated data of the immunoblotting related to Figure 5.

6A

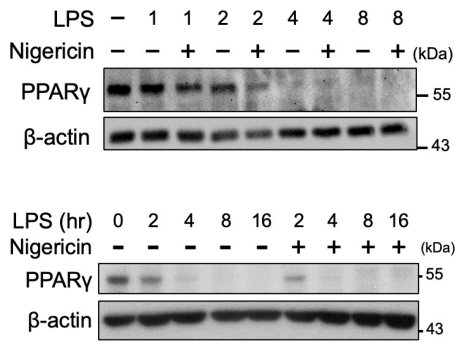

6E

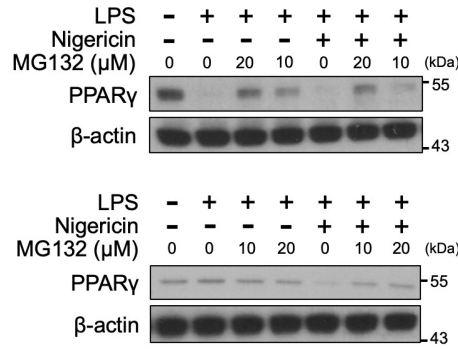

6F

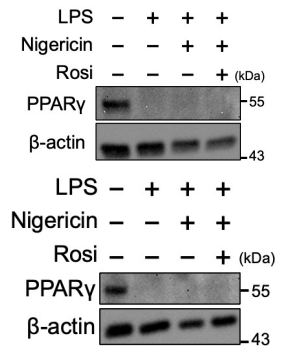

6H

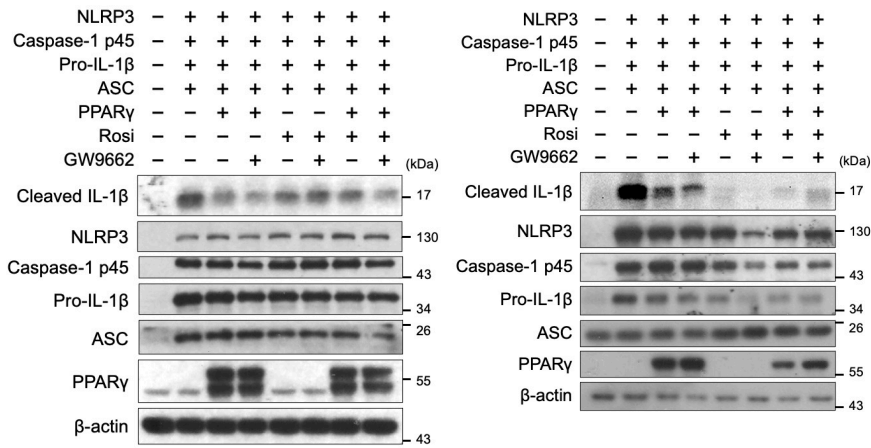

6I

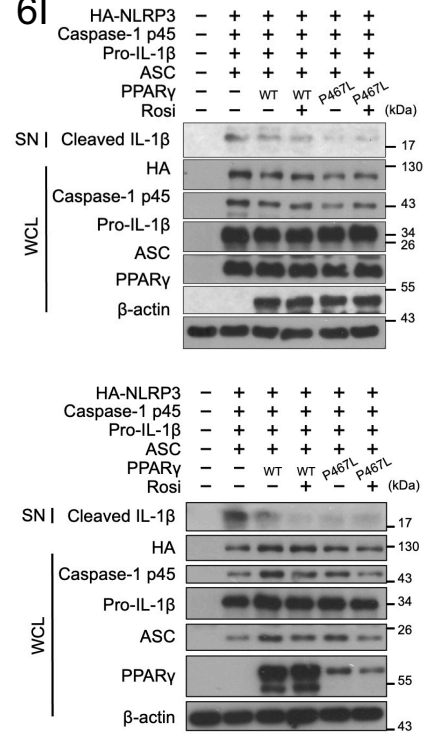

1

2 **Figure S15. Repeated data of the immunoblotting related to Figure 6.**

3



7A

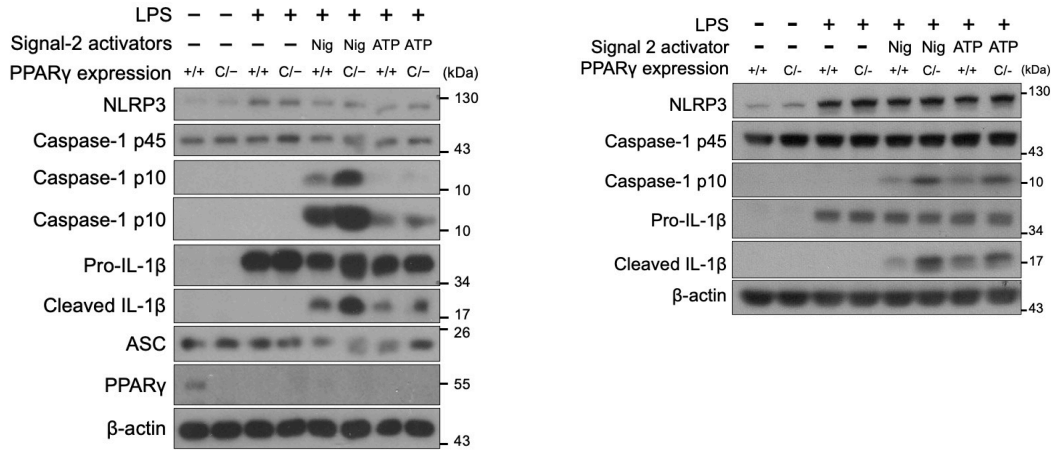

7B

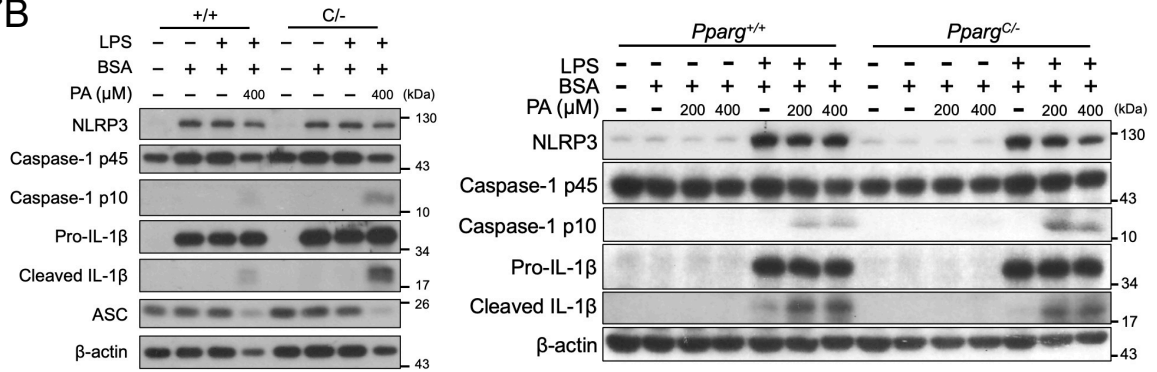

1

2 **Figure S16. Repeated data of the immunoblotting related to Figure 7.**

3

1

## Supplementary Tables

2 **Table S1. List of plasmids used in experiments.**

| Plasmid                               | Vector | Source                                                                                             |
|---------------------------------------|--------|----------------------------------------------------------------------------------------------------|
| HA-NLRP3                              |        |                                                                                                    |
| ASC                                   | pcDNA4 | Dr. Ming-Zong Lai, Academia Sinica, Taiwan                                                         |
| Pro-caspase-1                         |        |                                                                                                    |
| Pro-IL-1 $\beta$                      |        |                                                                                                    |
| PPAR $\gamma$                         |        |                                                                                                    |
| PPAR $\gamma$ - $\Delta$ AF-2         |        |                                                                                                    |
| PPAR $\gamma$ - $\Delta$ He3          | pCMV2  | Dr. Yau-Sheng Tsai, Institute of Clinical Medicine, National Cheng Kung University, Tainan, Taiwan |
| PPAR $\gamma$ - $\Delta$ LBD          |        |                                                                                                    |
| PPAR $\gamma$ - $\Delta$ AF-1         |        |                                                                                                    |
| PPAR $\gamma$ - $\Delta$ A/B          |        |                                                                                                    |
| PPAR $\gamma$ - $\Delta$ DBD          |        |                                                                                                    |
| NLRP3- $\Delta$ PYD                   |        |                                                                                                    |
| NLRP3- $\Delta$ NBD                   |        |                                                                                                    |
| NLRP3- $\Delta$ LRR                   |        |                                                                                                    |
| NLRP3- $\Delta$ LRR <sup>LXXXLL</sup> | pcDNA4 | Dr. Yau-Sheng Tsai, Institute of Clinical Medicine, National Cheng Kung University, Tainan, Taiwan |
| NLRP3-mLRR                            |        |                                                                                                    |
| NLRP3-mNBD                            |        |                                                                                                    |
| NLRP3-PYD                             |        |                                                                                                    |
| NLRP3-NBD                             |        |                                                                                                    |
| NLRP3-LRR                             |        |                                                                                                    |

3

4

1 **Table S2. List of antibodies used in experiments.**

| Antigen                     | Host   | Cat.        | Source         | Applications |
|-----------------------------|--------|-------------|----------------|--------------|
| <b>Primary antibodies</b>   |        |             |                |              |
| NLRP3                       | Mouse  | AG-20B-0014 | Adipogen       | WB, IP       |
|                             | Goat   | ab4207      | Abcam          | IF           |
| PPAR $\gamma$               | Rabbit | #2443       | Cell signaling | WB, IP       |
|                             | Rabbit | sc-7196     | Santa Cruz     | WB           |
|                             | Mouse  | ab41928     | Abcam          | IF           |
| ASC                         | Rabbit | AG-25B-0006 | Adipogen       | WB, IP, IF   |
| Caspase-1                   | Rabbit | ab179515    | Abcam          | WB           |
| IL-1 $\beta$                | Goat   | AF-401-NA   | R&D systems    | WB           |
| c-Myc tag                   | Mouse  | sc-40       | Santa Cruz     | WB           |
| HA tag                      | Mouse  | MMS-101R    | Covance        | WB, IP       |
| $\beta$ -actin              | Mouse  | A5441       | Sigma          | WB           |
| Mouse IgG                   | Mouse  | 12-371      | Millipore      | IP           |
| Rabbit IgG                  | Rabbit | 12-370      | Millipore      | IP           |
| <b>Secondary antibodies</b> |        |             |                |              |
| anti-Mouse IgG-<br>HRP      | Goat   | 20102       | Leadgene       | WB           |
| anti-Rabbit IgG-<br>HRP     | Goat   | 20202       | Leadgene       | WB           |
| Anti-Goat IgG               | Rabbit | 5220-0362   | Seracare       | WB           |

2 \*WB, western blotting; IP, Immunoprecipitation; IF, Immunofluorescence

3

1 **Table S3. List of human samples.**

| S/N | Gender | Age | Procedure type<br>(Mini-gastric bypass,<br>Sleeve gastrectomy,<br>or Gastric banding) | BMI<br>(Before<br>Surgery) | BMI<br>(6mth<br>after<br>Surgery) | BMI<br>(12mth<br>after<br>Surgery) | Involved<br>in panel<br>of<br>Figure 7 |
|-----|--------|-----|---------------------------------------------------------------------------------------|----------------------------|-----------------------------------|------------------------------------|----------------------------------------|
| 1   | F      | 23  | Sleeve gastrectomy                                                                    | 43.2                       | -                                 | 30.8                               | H                                      |
| 2   | F      | 27  | Sleeve gastrectomy                                                                    | 41.6                       | 33.5                              | -                                  | H                                      |
| 3   | F      | 29  | Sleeve gastrectomy                                                                    | 42.6                       | 31.4                              | -                                  | D, F, G                                |
| 4   | F      | 44  | Mini-gastric bypass                                                                   | 48.2                       | 35.5                              | 34.0                               | D, F, G                                |
| 5   | F      | 22  | Sleeve gastrectomy                                                                    | 41.6                       | -                                 | -                                  | H                                      |
| 6   | F      | 35  | Sleeve gastrectomy                                                                    | 44.1                       | 31.8                              | -                                  | D                                      |
| 7   | F      | 29  | Gastric banding                                                                       | 38.9                       | 32.4                              | 32.0                               | D, F, G                                |
| 8   | M      | 39  | Sleeve gastrectomy                                                                    | 38.5                       | 27.2                              | -                                  | D, F, G                                |
| 9   | F      | 37  | Sleeve gastrectomy                                                                    | 48.1                       | 34.5                              | 34.5                               | D, F, G                                |
| 10  | F      | 56  | Sleeve gastrectomy                                                                    | 34.3                       | -                                 | -                                  | D                                      |
| 11  | F      | 34  | Sleeve gastrectomy                                                                    | 45.6                       | -                                 | -                                  | D                                      |
| 12  | M      | 27  | Sleeve gastrectomy                                                                    | 33.7                       | -                                 | -                                  | D                                      |
| 13  | F      | 23  | Sleeve gastrectomy                                                                    | 37.2                       | -                                 | -                                  | D                                      |
| 14  | F      | 47  | Sleeve gastrectomy                                                                    | 40.5                       | -                                 | -                                  | H                                      |
| 15  | F      | 57  | Sleeve gastrectomy                                                                    | 40.4                       | -                                 | 29.0                               | H                                      |
| 16  | M      | 28  | Sleeve gastrectomy                                                                    | 49.6                       | -                                 | 26.6                               | H                                      |
| 17  | M      | 40  | Sleeve gastrectomy                                                                    | 41.5                       | 29.0                              | 27.9                               | H                                      |
| 18  | M      | 46  | Sleeve gastrectomy                                                                    | 44.1                       | 35                                | -                                  | H                                      |
| 19  | M      | 32  | Mini-gastric bypass                                                                   | 34.2                       | 27                                | -                                  | H                                      |
| 20  | M      | 25  |                                                                                       | 29.7                       | -                                 | -                                  | E                                      |
| 21  | M      | 24  |                                                                                       | 34.4                       | -                                 | -                                  | E                                      |
| 22  | M      | 25  |                                                                                       | 23.3                       | -                                 | -                                  | E                                      |
| 23  | M      | 24  |                                                                                       | 19.3                       | -                                 | -                                  | E                                      |
| 24  | F      | 28  | Control subjects                                                                      | 25.3                       | -                                 | -                                  | E                                      |
| 25  | F      | 25  |                                                                                       | 22.0                       | -                                 | -                                  | E                                      |
| 26  | M      | 35  |                                                                                       | 19.6                       | -                                 | -                                  | E                                      |
| 27  | F      | 29  |                                                                                       | 27.5                       | -                                 | -                                  | E                                      |
| 28  | F      | 26  |                                                                                       | 23.3                       | -                                 | -                                  | E                                      |

|    |   |    |                  |      |   |   |   |
|----|---|----|------------------|------|---|---|---|
| 29 | F | 25 |                  | 25.5 | - | - | E |
| 30 | F | 26 | Control subjects | 18.8 | - | - | E |
| 31 | F | 33 |                  | 31.2 | - | - | E |

-. N/A

The subject (S/N: 4) was analyzed in both 6 and 12 months after surgery.

Figure 7G used same subjects with Figure 7F.

1

1 **Table S4. Summary of NBD and LRR sequence analysis between NLRC4 and NLRP3 by**  
2 **BLAST results.**

| Organism | Domain | Total score | Query coverage | Identity (%) | e-value |
|----------|--------|-------------|----------------|--------------|---------|
| Human    | LRR    | 135.0       | 46%            | 27.44%       | 1e-05   |
|          | NBD    | 62.0        | 63%            | 21.34%       | 2e-09   |
| Mouse    | LRR    | 148.0       | 57%            | 27.57%       | 6e-08   |
|          | NBD    | 69.7        | 65%            | 24.50%       | 5e-12   |

3
